# Supplementary material for: Spatially heterogeneous effect of the climate warming on the Arctic land ice
Source: Copernicus journal article supplement (doi:10.5194/tc-2023-7), 2023-03-28
Supplement: Supplementary file 1 [file tc-2023-7-supplement.pdf]

# Spatially heterogeneous effect of the climate warming on the Arctic land ice

Damien Maure<sup>1,2</sup>, Christoph Kittel<sup>2,1</sup>, Clara Lambin<sup>1</sup>, Alison Delhasse<sup>1</sup>, and Xavier Fettweis<sup>1</sup>

<sup>1</sup>SPHERES research unit, Geography, University of Liège, Liège, Belgium

<sup>2</sup>Université Grenoble Alpes, CNRS, IRD, Grenoble INP, IGE, 38000 Grenoble, France

**Correspondence:** damien.maure@uliege.be

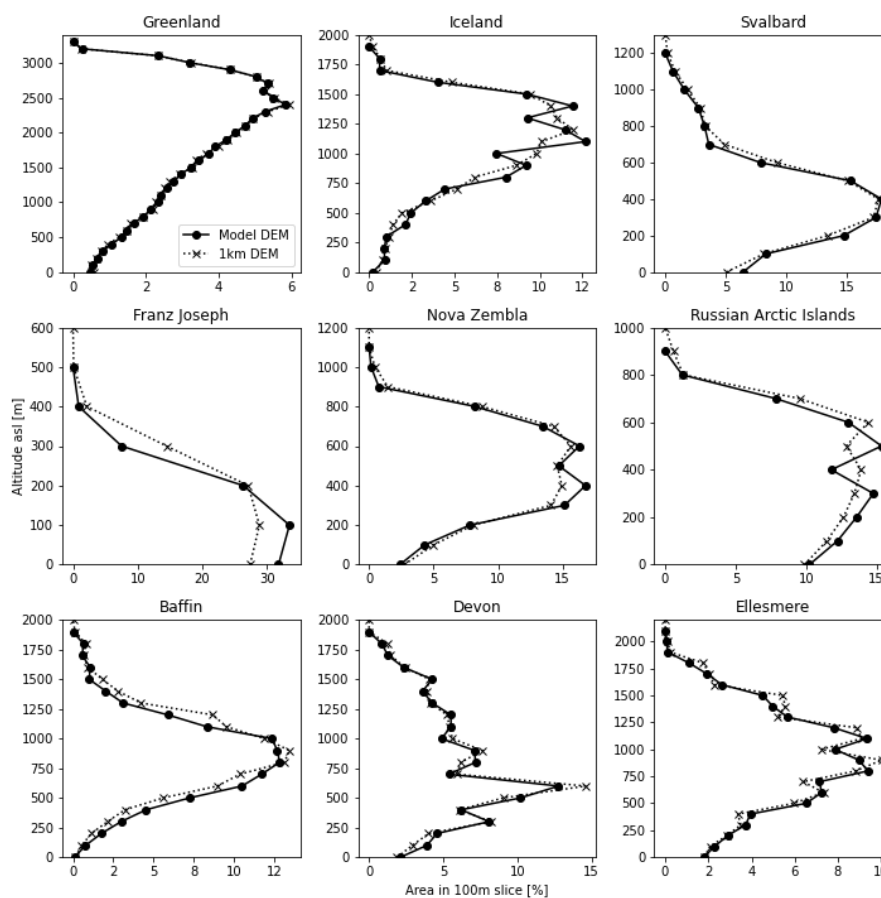

**Figure S1.** Comparison of the hypsometry of the land ice from the model grids (6 km resolution, in dots, solid line) and of a 1km grid in the same georeferencing system (x marks, dotted line). Both DEMs come from ETOPO01.

| Variable  | Sub Domain | Mean Observed | Bias  | CRMSE | r    |
|-----------|------------|---------------|-------|-------|------|
| P2m [hPa] | Greenland  | 1006.96       | 3.35  | 1.60  | 0.99 |
|           | Russia     | 1013.75       | -4.35 | 2.15  | 0.98 |
|           | Svalbard   | 1008.87       | 0.51  | 2.45  | 0.98 |
|           | Iceland    | 1006.46       | -5.13 | 0.95  | 1.00 |
|           | Canada     | 1005.68       | -4.74 | 2.75  | 0.96 |
| T2m [°C]  | Greenland  | -7.49         | -1.24 | 3.07  | 0.95 |
|           | Russia     | -10.74        | -1.72 | 3.33  | 0.96 |
|           | Svalbard   | -4.58         | -2.48 | 3.59  | 0.92 |
|           | Iceland    | 4.13          | -0.33 | 1.68  | 0.96 |
|           | Canada     | -13.49        | 0.14  | 3.33  | 0.98 |

**Table S1.** Evaluation results for the pre-International Geophysical Year period (1950 - 1956)

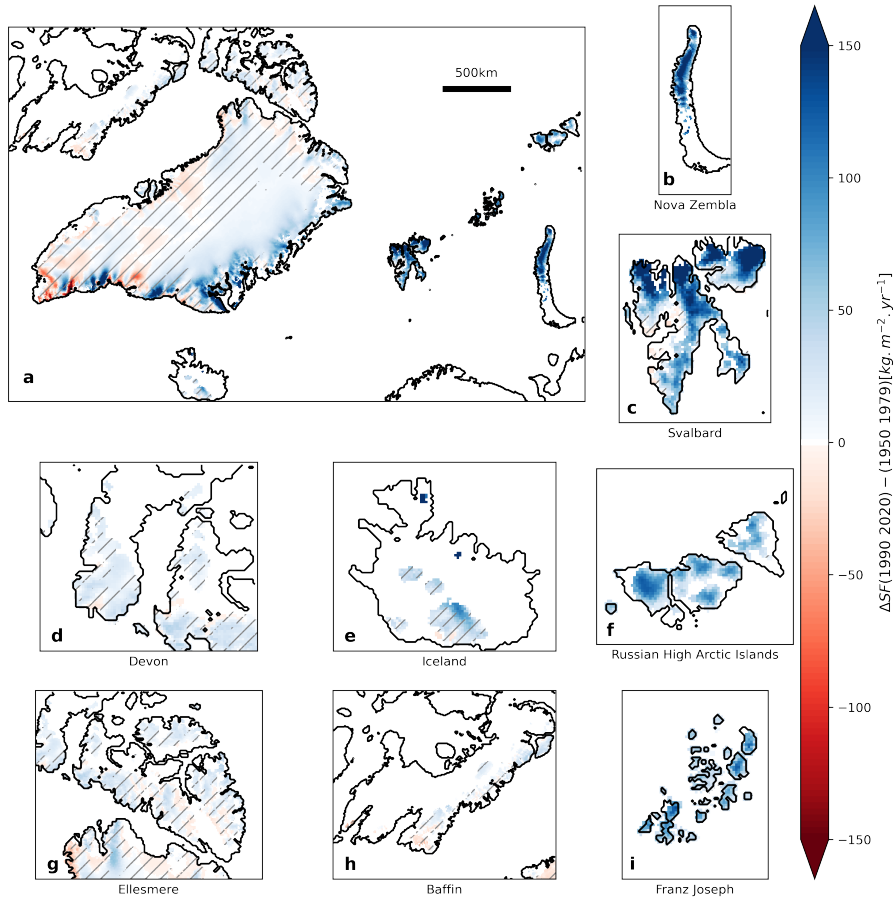

**Figure S2.** Annual SF anomalies between the (1990-2020) and (1950-1979) periods over (a) the whole Arctic, (b) Nova Zembla, (c) Svalbard, (d) Devon, (e) Iceland, (f) Russian High Arctic Islands, (g) Ellesmere, (h) Baffin and (i) Franz Joseph land. Hashed areas denote where the anomaly has a low significance value regarding its variance (using Student's t-test with 90% p-value)
